# Supplementary material for: High-performance hardware primitives based on sub-10 nm nanodiodes for cryptography applications
Source: Royal Society of Chemistry journal article supplement (doi:10.1039/d4tc02206h), 2024-01-01
Supplement: d4tc02206h1.pdf [file d4tc02206h1.pdf]

## Supporting Information

### High-Performance hardware primitives based on sub-10 nm nanodiodes for cryptography applications

*Kun Chen<sup>†</sup>, Nannan Li<sup>†</sup>, Yi Luo<sup>\*</sup>, and Yao Yao<sup>\*</sup>*

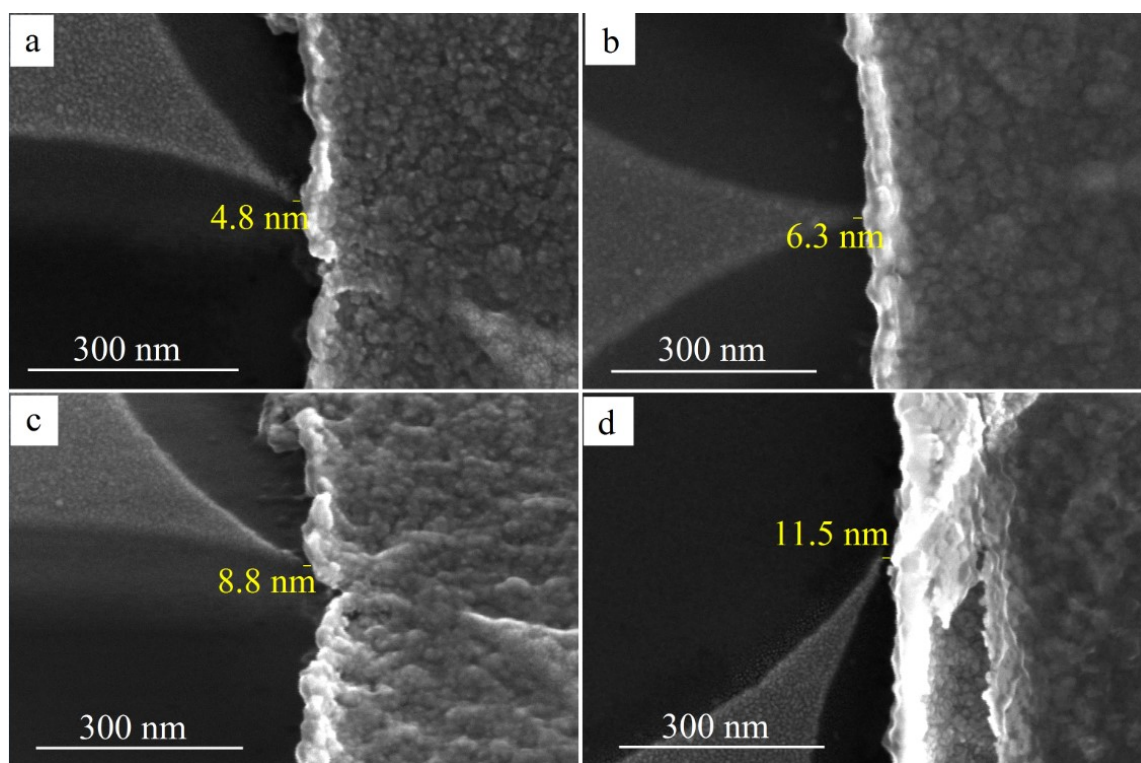

**Figure S1.** SEM images of nanodiodes with different tip-to-edge vacuum-like air-channel length.

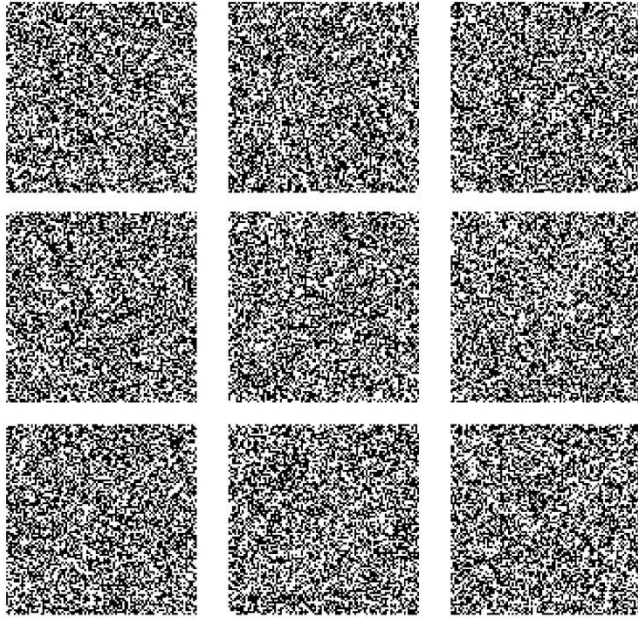

**Figure S2. Bitmap of random sequences from nine repeated experiments. Black points represent bit '0' and white points represent bit '1'. Obviously, the bitmaps vary completely among the nine experiments. In addition, these bitmaps show a balanced distribution of black and white points and do not display any distinct repetitive patterns or regularity, illustrating a high degree of randomness.**

| Ref       | Material and device                               | Power consumption |
|-----------|---------------------------------------------------|-------------------|
| [1]       | WSe <sub>2</sub> and WS <sub>2</sub> FETs         | 10 pJ/bit         |
| [2]       | h-BN MIM memristor                                | 2 nJ/bit          |
| [3]       | Bi <sub>2</sub> O <sub>2</sub> Se-based memristor | 0.2~2pJ/bit       |
| [4]       | MoS <sub>2</sub> Fe-FETs                          | 1~50 pJ/bit       |
| This work | sub-10 nm<br>air-channel nanodiode                | 1E-3pJ/bit        |

**Table S1. Power consumption of typical schemes**

| Test name                | Uniformity of p-values | Proportion | Assessment |
|--------------------------|------------------------|------------|------------|
| Frequency                | 0.148094               | 63/64      | PASSED     |
| Block Frequency          | 0.911413               | 64/64      | PASSED     |
| Cumulative Sums          | 0.148094               | 63/64      | PASSED     |
| Runs                     | 0.350485               | 63/64      | PASSED     |
| Longest Run              | 0.437274               | 64/64      | PASSED     |
| Rank                     | 0.637119               | 62/64      | PASSED     |
| FFT                      | 0.324180               | 64/64      | PASSED     |
| Non Overlapping Template | 0.002316               | 64/64      | PASSED     |
| Overlapping Template     | 0.834308               | 64/64      | PASSED     |
| Approximate Entropy      | 0.074177               | 63/64      | PASSED     |
| Serial                   | 0.162606               | 64/64      | PASSED     |
| Linear Complexity        | 0.468595               | 63/64      | PASSED     |

**Table S2. Results of NIST SP800-22 test for random bit streams from nano-TRNG. The minimum value is reported for test items with multiple outcomes. A test item is considered to pass when the uniformity of p-values exceeds a significance level of 0.0001 and the pass proportion is above the criterion of 60/64. Detailed results indicate that extracted random bits successfully pass all available tests.**

| Test name                    | P-value | Assessment |
|------------------------------|---------|------------|
| Multinomial Bits Over (L=2)  | 0.32    | PASSED     |
| Multinomial Bits Over (L=4)  | 0.12    | PASSED     |
| Multinomial Bits Over (L=8)  | 0.34    | PASSED     |
| Multinomial Bits Over (L=16) | 0.97    | PASSED     |
| Hamming Independency (L=16)  | 0.71    | PASSED     |
| Hamming Independency (L=32)  | 0.52    | PASSED     |
| Hamming Correlation (L=32)   | 0.32    | PASSED     |
| Random Walk H (L=64)         | 0.21    | PASSED     |
| Random Walk M (L=64)         | 0.46    | PASSED     |
| Random Walk J (L=64)         | 0.37    | PASSED     |
| Random Walk R (L=64)         | 0.28    | PASSED     |
| Random Walk C (L=64)         | 0.11    | PASSED     |
| Random Walk H (L=320)        | 0.72    | PASSED     |
| Random Walk M (L=320)        | 0.05    | PASSED     |
| Random Walk J (L=320)        | 0.52    | PASSED     |
| Random Walk R (L=320)        | 0.83    | PASSED     |
| Random Walk C (L=320)        | 0.13    | PASSED     |

**Table S3. Results of TestU01 Alphabit test for random bit streams. The TestU01 Alphabit battery evaluates the randomness of random bits with the aim of evaluating physical entropy source. The worst case is selected when multiple p-values are produced in a test. For “pass,” each p-value should fall into the range of [0.001, 0.999]. As indicated by the results, the random bits from nano-TRNG are considered to successfully pass the Alphabit battery.**

| Test name            | P-value    | Assessment |
|----------------------|------------|------------|
| Diehard_birthdays    | 0.78411886 | PASSED     |
| Diehard_operm5       | 0.18263935 | PASSED     |
| Diehard_rank_32x32   | 0.56313029 | PASSED     |
| Diehard_rank_6x8     | 0.71633706 | PASSED     |
| Diehard_bitstream    | 0.79034377 | PASSED     |
| Diehard_opso         | 0.50905934 | PASSED     |
| Diehard_oqso         | 0.52519766 | PASSED     |
| Diehard_dna          | 0.70139207 | PASSED     |
| Diehard_count_1s_str | 0.84587460 | PASSED     |
| Diehard_count_1s_byt | 0.24739316 | PASSED     |
| Diehard_parking_lot  | 0.72516127 | PASSED     |
| Diehard_2dsphere     | 0.57153969 | PASSED     |
| Diehard_3dsphere     | 0.23965050 | PASSED     |
| Diehard_squeeze      | 0.00591657 | PASSED     |
| Diehard_sums         | 0.02442857 | PASSED     |
| Diehard_runs         | 0.10196029 | PASSED     |
| Diehard_craps        | 0.53719022 | PASSED     |
| Marsaglia_tsang_gcd  | 0.40526218 | PASSED     |
| Sts_monobit          | 0.83012234 | PASSED     |
| Sts_runs             | 0.13520823 | PASSED     |
| Sts_serial           | 0.99938897 | WEAK       |
| Rgb_bitdist          | 0.05981224 | PASSED     |
| Rgb_minimum_distance | 0.28108138 | PASSED     |
| Rgb_permutations     | 0.32418848 | PASSED     |
| Rgb_lagged_sum       | 0.03403859 | PASSED     |
| Rgb_kstest_test      | 0.11456695 | PASSED     |

|                 |            |        |
|-----------------|------------|--------|
| Dab_bytedistrib | 0.85234119 | PASSED |
| Dab_dct         | 0.54693658 | PASSED |
| Dab_filltree    | 0.99922414 | WEAK   |
| Dab_filltree2   | 0.03518846 | PASSED |
| Dab_monobit2    | 0.90574448 | PASSED |

**Table S4. Results of DIEHARDER test for random bit streams. The test suite is a rather stringent and comprehensive statistical testing suite, consisting of 17 fundamental tests and 14 extended test items. The minimum value is reported for test items with multiple outcomes. In our case, the extracted random bits successfully pass all the test items, with only two tests marked as ‘weak’ (i.e., marginal success).**

| Test name                             | Assessment |
|---------------------------------------|------------|
| Excursion test statistic              | PASSED     |
| Number of directional runs            | PASSED     |
| Length of directional runs            | PASSED     |
| Number of increases and decreases     | PASSED     |
| Number of runs based on the median    | PASSED     |
| Length of runs based on median        | PASSED     |
| Average collision test statistic      | PASSED     |
| Maximum collision test statistic      | PASSED     |
| Periodicity test statistic (lag = 1)  | PASSED     |
| Periodicity test statistic (lag = 2)  | PASSED     |
| Periodicity test statistic (lag = 8)  | PASSED     |
| Periodicity test statistic (lag = 16) | PASSED     |
| Periodicity test statistic (lag = 32) | PASSED     |

|                                          |          |
|------------------------------------------|----------|
| Covariance test statistic (lag = 1)      | PASSED   |
| Covariance test statistic (lag = 2)      | PASSED   |
| Covariance test statistic (lag = 8)      | PASSED   |
| Covariance test statistic (lag = 16)     | PASSED   |
| Covariance test statistic (lag = 32)     | PASSED   |
| Compression test statistic               | PASSED   |
| Chi-square independence                  | PASSED   |
| Chi-square goodness of fit               | PASSED   |
| Length of the longest repeated substring | PASSED   |
| Sanity check                             | PASSED   |
| Validation test                          | PASSED   |
| Estimation of entropy                    | 0.995817 |

**Table S5. Results of NIST SP800-90B test. In our case, the entropy source successfully pass all tests and demonstrates a min-entropy of 0.995817 bits/bit.**



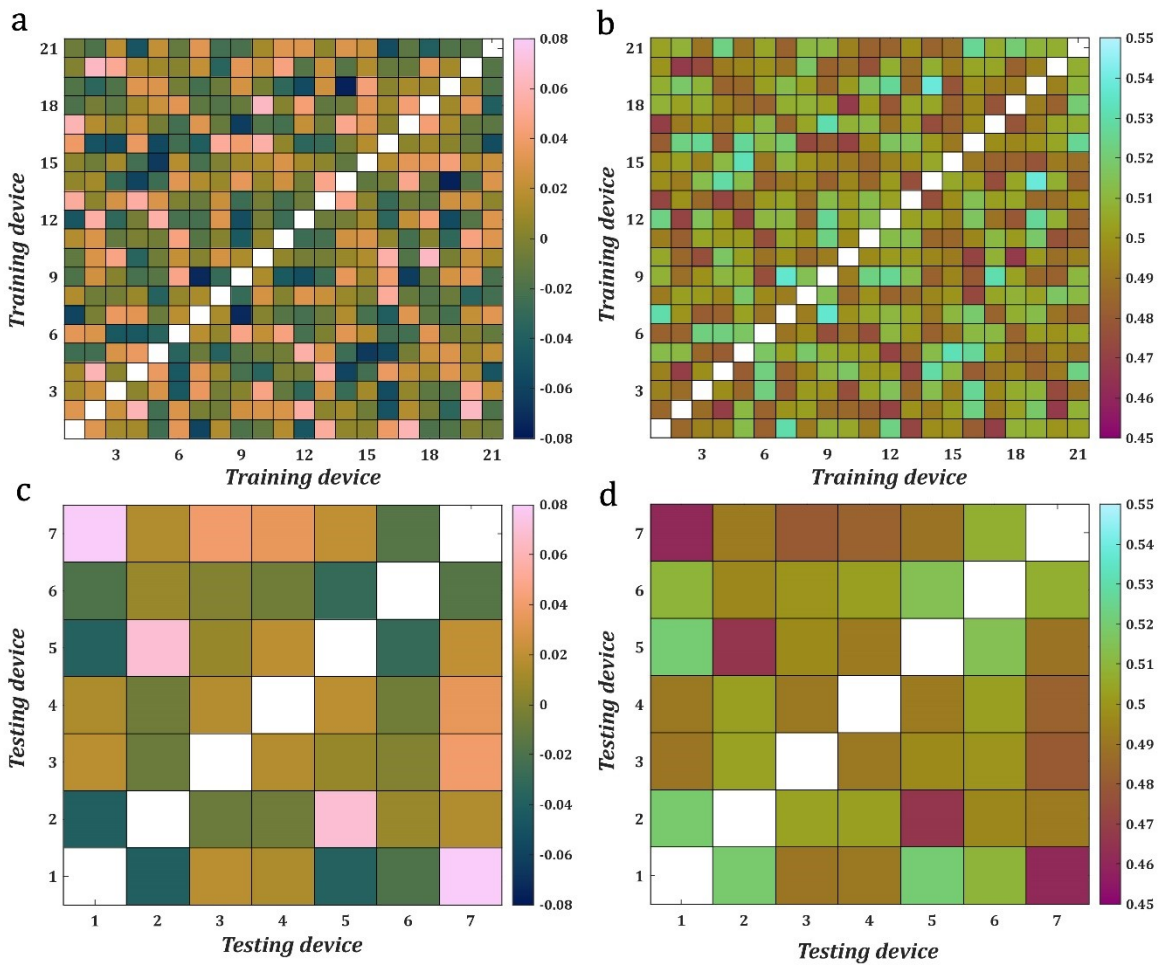

**Figure S3. (a)-(d). Hamming distance (a) and correlation coefficient (b) for random bits of twenty-one devices in the training set. Hamming distance (c) and correlation coefficient (d) for random bits of seven devices used for test set.**

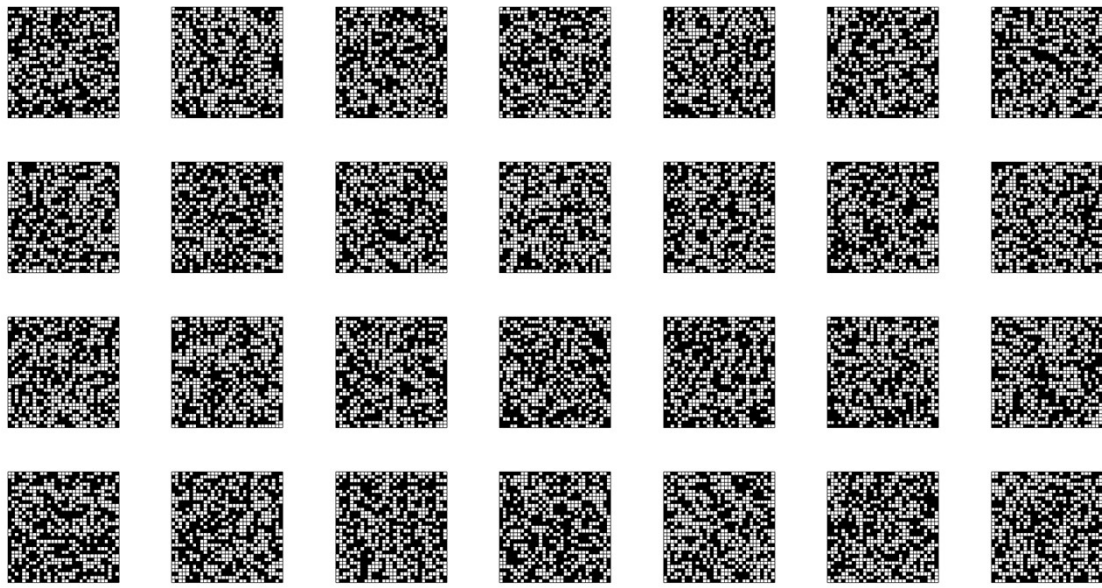

Figure S4. Bitmaps from 28 individual devices.

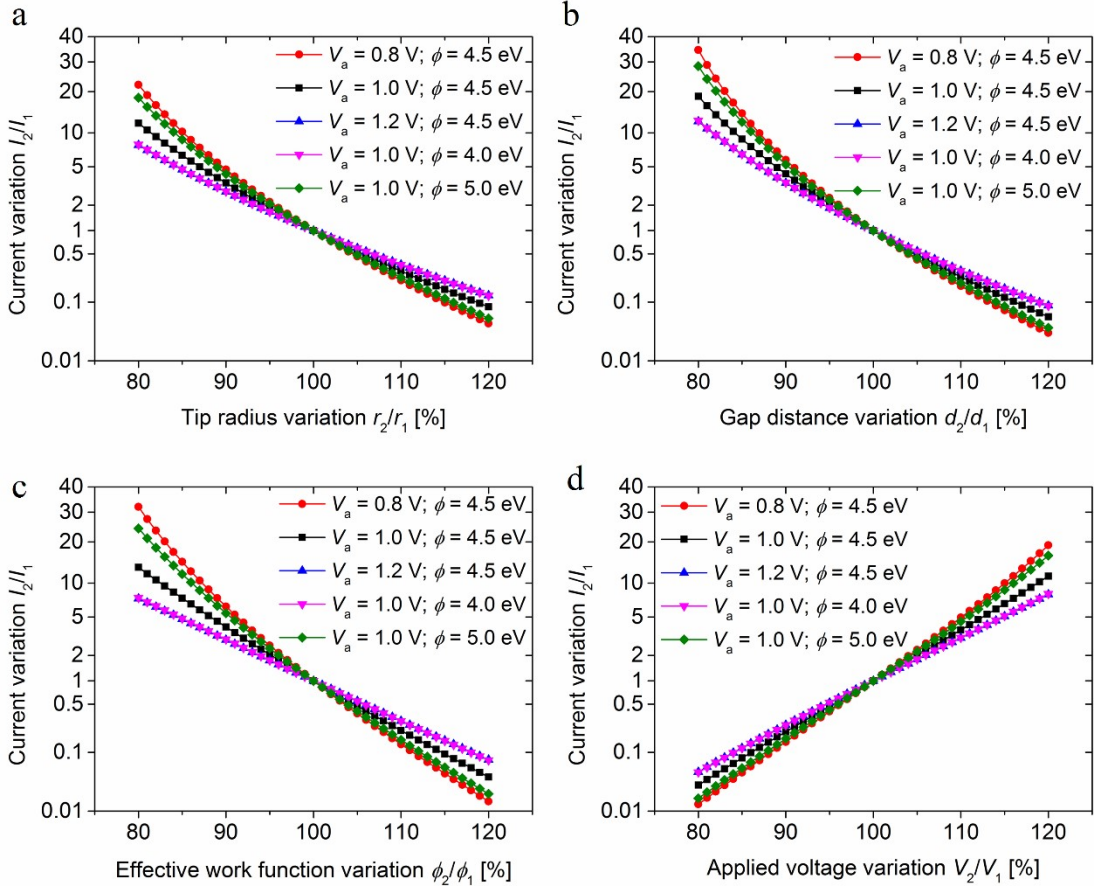

**Figure S5. Theoretical current fluctuations under variations in physical geometry, material properties, and operating environments. (a) The effect of tip radius variation on emission current fluctuations when  $\varphi_2 = \varphi_1 = \varphi$ ,  $E_2/E_1 = r_1/r_2$ , and gap distance  $d = 10$  nm. (b) The effect of gap distance variation on emission current fluctuations when  $\varphi_2 = \varphi_1 = \varphi$ ,  $r_1 = r_2$ ,  $E_2/E_1 = d_1/d_2$ , and  $d_1 = 10$  nm. (c) The effect of effective work function variation on emission current fluctuations when  $r_1 = r_2$ ,  $E_2 = E_1$ , and  $d_1 = d_2$ . (d) The effect of applied voltage variation on emission current fluctuations when  $r_1 = r_2$ ,  $\varphi_2 = \varphi_1 = \varphi$ ,  $E_2/E_1 = V_2/V_1$ , and  $d_1 = d_2 = 10$  nm.**

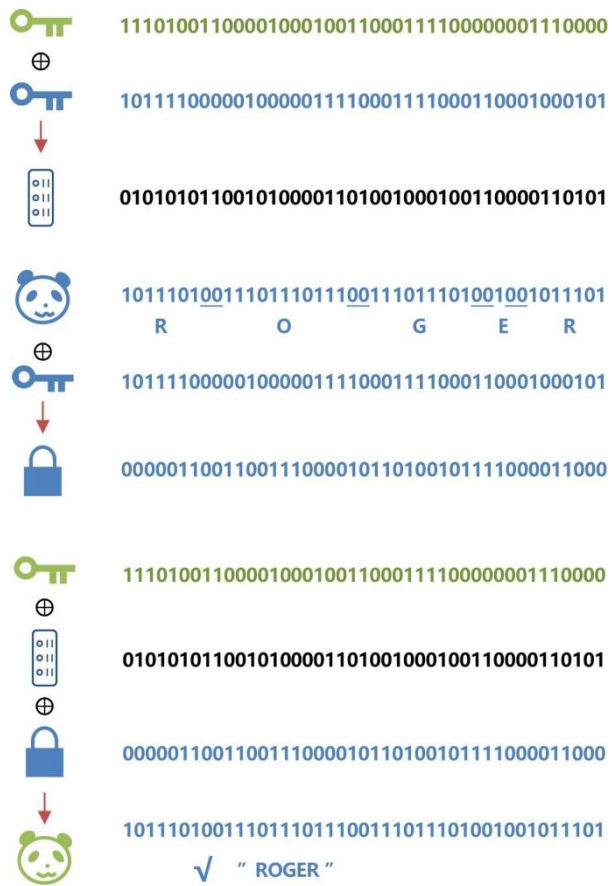

Figure S6. The encryption and decryption process of the feedback signal "ROGER". Alice accurately decrypts the message sent by Bob according to our encoding rules.

### Supporting Information References

- [1] A. Wali, H. Ravichandran, S. Das, *ACS Nano* 2021, 15, 17804.
- [2] C. Wen, X. Li, T. Zanotti, F. Maria Puglisi, Y. Shi, F. Saiz, A. Antidormi, S. Roche, W. Zheng, X. Liang, J. Hu, S. Duhm, J B. Roldan, T. Wu, V. Chen, E. Pop, B. Garrido, K. Zhu, F. Hui, M. Lanza, *Adv. Mater.* 2021, 33, 2100185.
- [3] B. Liu, Y.-F. Chang, J. Li, X. Liu, L. A. Wang, D. Verma, H. Liang, H. Zhu, Y. Zhao, L.-J. Li, T.-H. Hou, C.-S. Lai, *ACS Nano* 2022, 16, 6847.
- [4] Y.-C. Chien, H. Xiang, J. Wang, Y. Shi, X. Fong, K.-W. Ang, *Small* 2023, 19, 2302842.
